# Supplementary material
Source: ML conference proceedings conference paper supplement (https://openaccess.thecvf.com/content/ICCV2023/html/Chen_Single-Stage_Diffusion_NeRF_ICCV_2023_paper.html)
Supplement: Supplementary file 1 [file Chen_Single-Stage_Diffusion_NeRF_ICCV_2023_supplemental.zip]

Archive with 6 entries (6 files):
- 10495-supp.pdf
- singleview_cars.mp4
- singleview_chairs.mp4
- singleview_kitti.mp4
- uncond_cars.mp4
- uncond_tables.mp4
